# Supplementary material
Source: HighWire-hosted journal article supplement (https://www.annfammed.org/highwire/filestream/8046/field_highwire_adjunct_files/1/DAppendix_2.pdf)
Supplement: DAppendix_2.pdf [file DAppendix_2.pdf]

Dietrich A, Oxman T, Williams J, et al Going to scale: re-engineering systems for primary care treatment of depression. *Ann Fam Med*. 2004;2:301-304.

<http://www.annfammed.org/cgi/content/full/2/4/301/DC1>

---

## Appendix 2. Project Design

The RESPECT-Depression Project has 3 distinct phases. All 3 phases are based on an enhanced clinical model of depression management that is applied in practices through a practice change strategy utilizing available resources.

In the first phase, the clinical model of enhanced depression care was pilot tested and refined in representative community practices selected by each of the participating health care organizations (HCOs). For the second phase, additional practices seeking to improve depression care were recruited by the HCOs to participate in a randomized controlled trial. Since the intervention is applied practice-wide, the practice is the unit of randomization with practices within each HCO paired according to size, presence of on-site mental health professionals, and predominant specialty (family practice or internal medicine). The trial is assessing the impact of the clinical model and the practice change strategy on the depression care process and clinical outcomes compared to that achieved with usual care. The third phase will evaluate sustainability and dissemination potential. The research protocol and consent forms were reviewed and approved by the institutional review boards of the HCOs and the investigators.
